# Supplementary material
Source: publisher figshare collection journal article supplement (https://acs.figshare.com/ndownloader/files/4864192)
Supplement: Supplementary file 1 [file 4864192]

## Single heteroatom fine tuning of the emissive properties in organoboron complexes with 7-(azaheteroaryl)indole systems.

Miriam Más-Montoya, Laura Usea, Arturo Espinosa Ferao, María F. Montenegro, Carmen Ramírez de Arellano, Alberto Tárraga, José N. Rodríguez-López and David Curiel\*.

### SUPPORTING INFORMATION

|                                                    |    |
|----------------------------------------------------|----|
| 1. $^1\text{H}$ -NMR and $^{13}\text{C}$ -NMR..... | 2  |
| 2. X-ray structures.....                           | 12 |
| 3. Thermogravimetric analysis.....                 | 15 |
| 4. Solvent effects.....                            | 15 |
| 5. Lippert-Mataga plots.....                       | 16 |
| 6. DFT and TD-DFT.....                             | 17 |
| 7. Thin film absorption and emission spectra.....  | 19 |
| 8. Cytotoxicity assays.....                        | 20 |

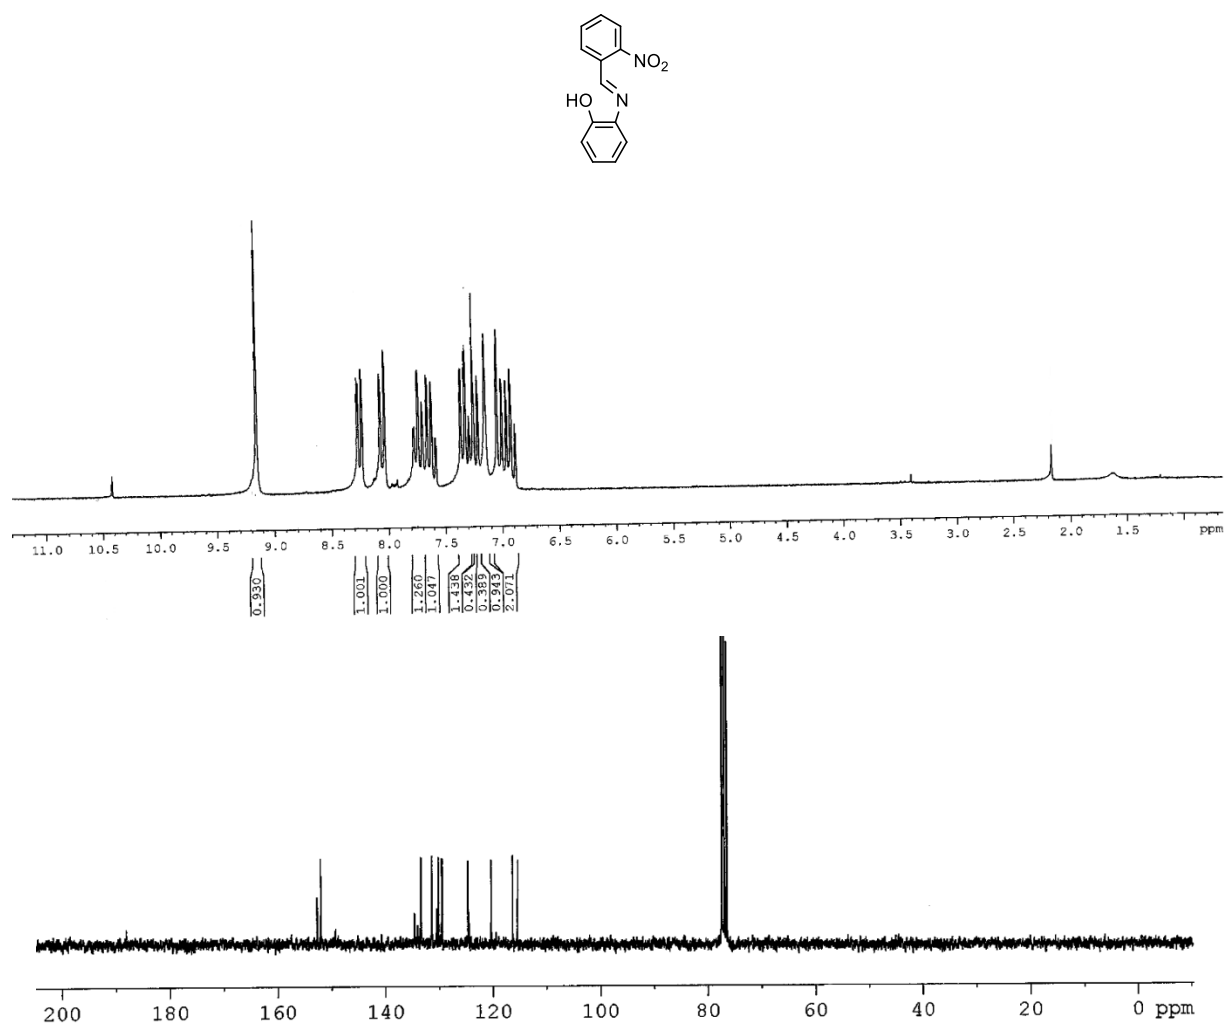

**Figure S1.**  $^1\text{H}$ -NMR and  $^{13}\text{C}$ -NMR spectra of compound **1**.

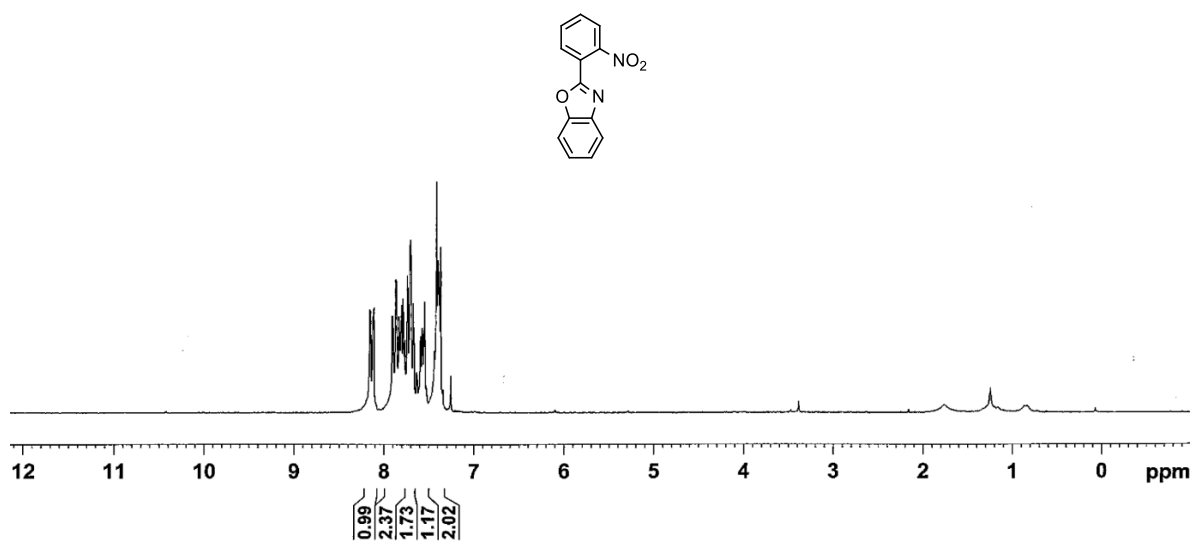

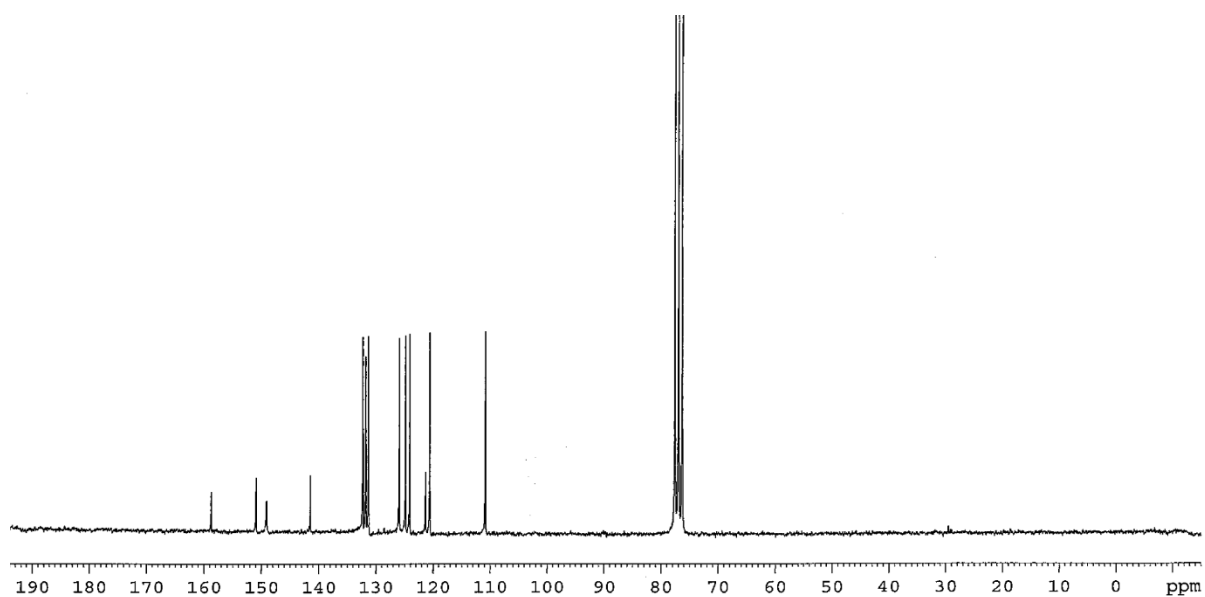

**Figure S2.** <sup>1</sup>H-NMR and <sup>13</sup>C-NMR spectra of compound 2.

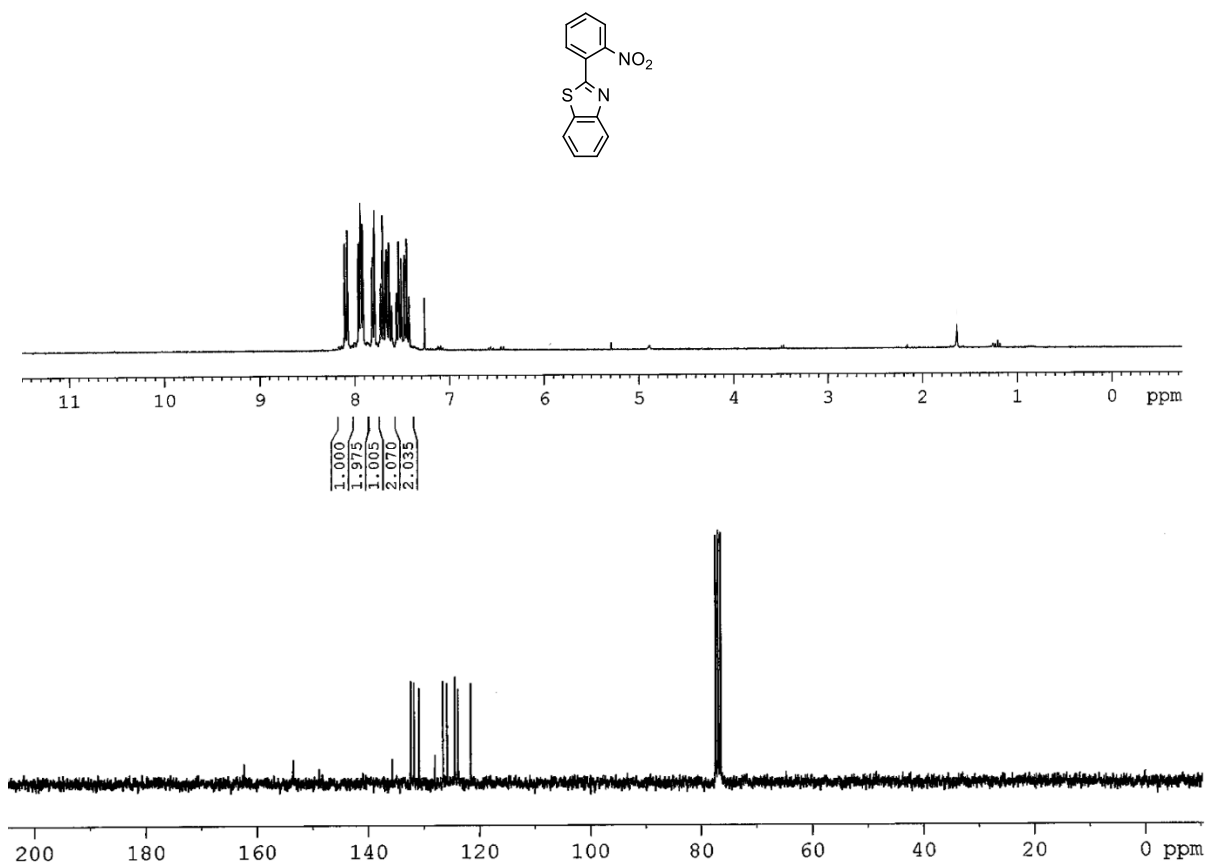

**Figure S3.** <sup>1</sup>H-NMR and <sup>13</sup>C-NMR spectra of compound 3.

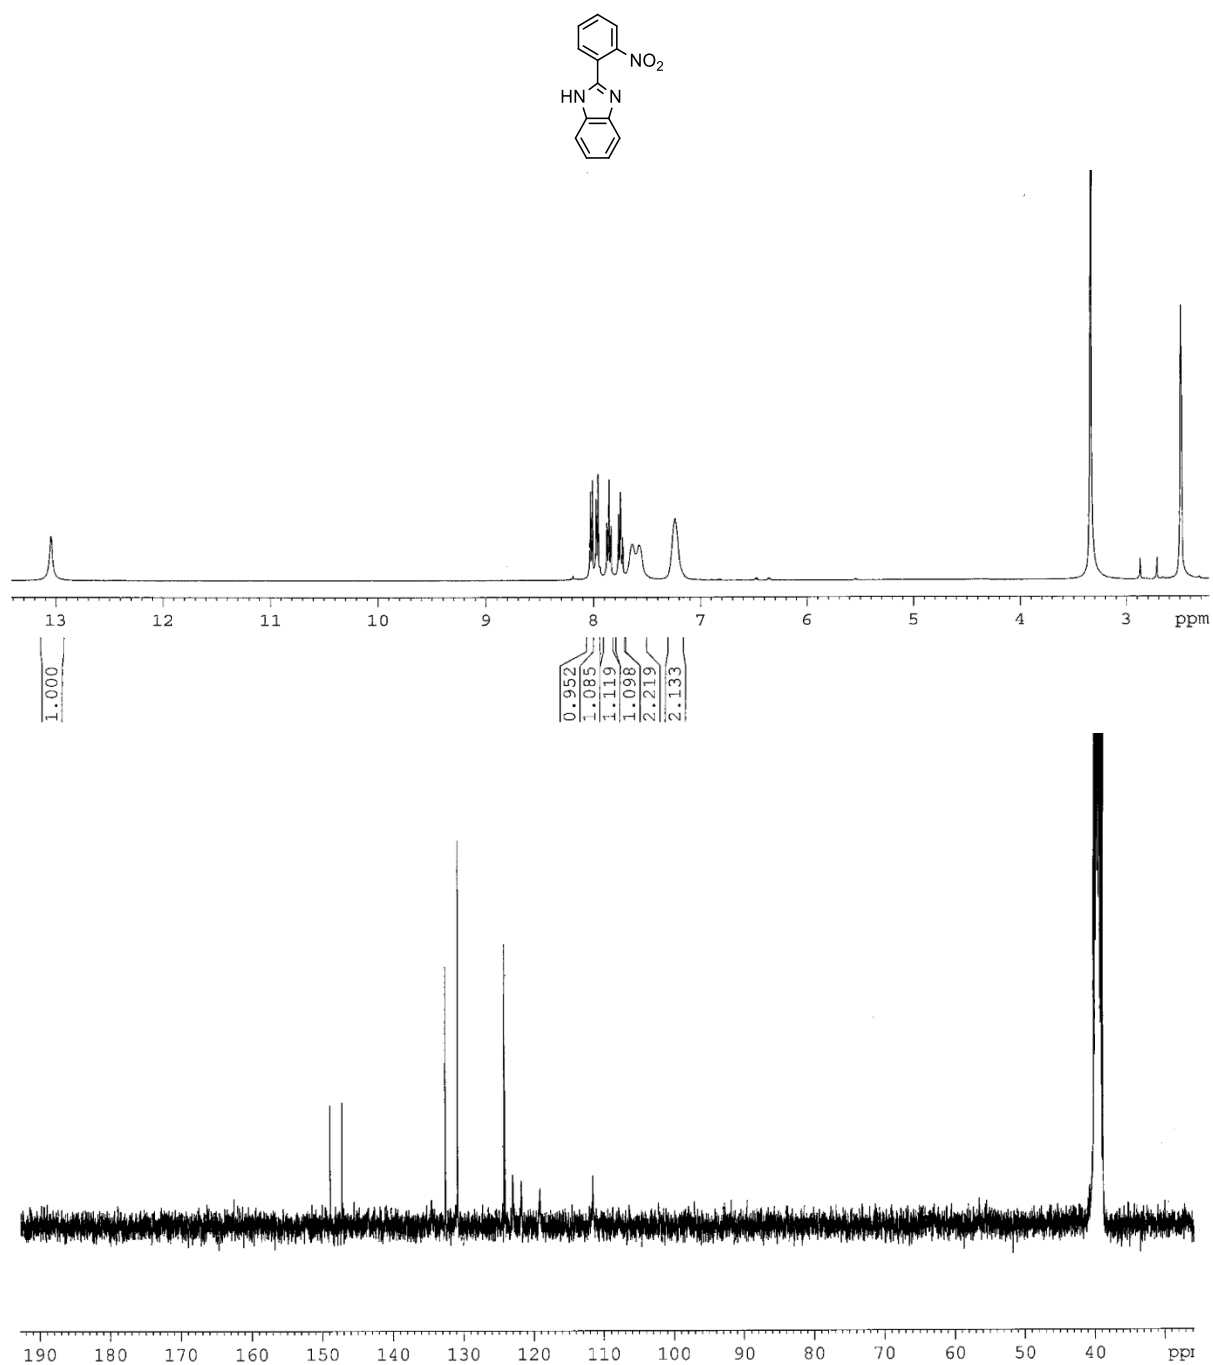

**Figure S4.** <sup>1</sup>H-NMR and <sup>13</sup>C-NMR spectra of compound **4**

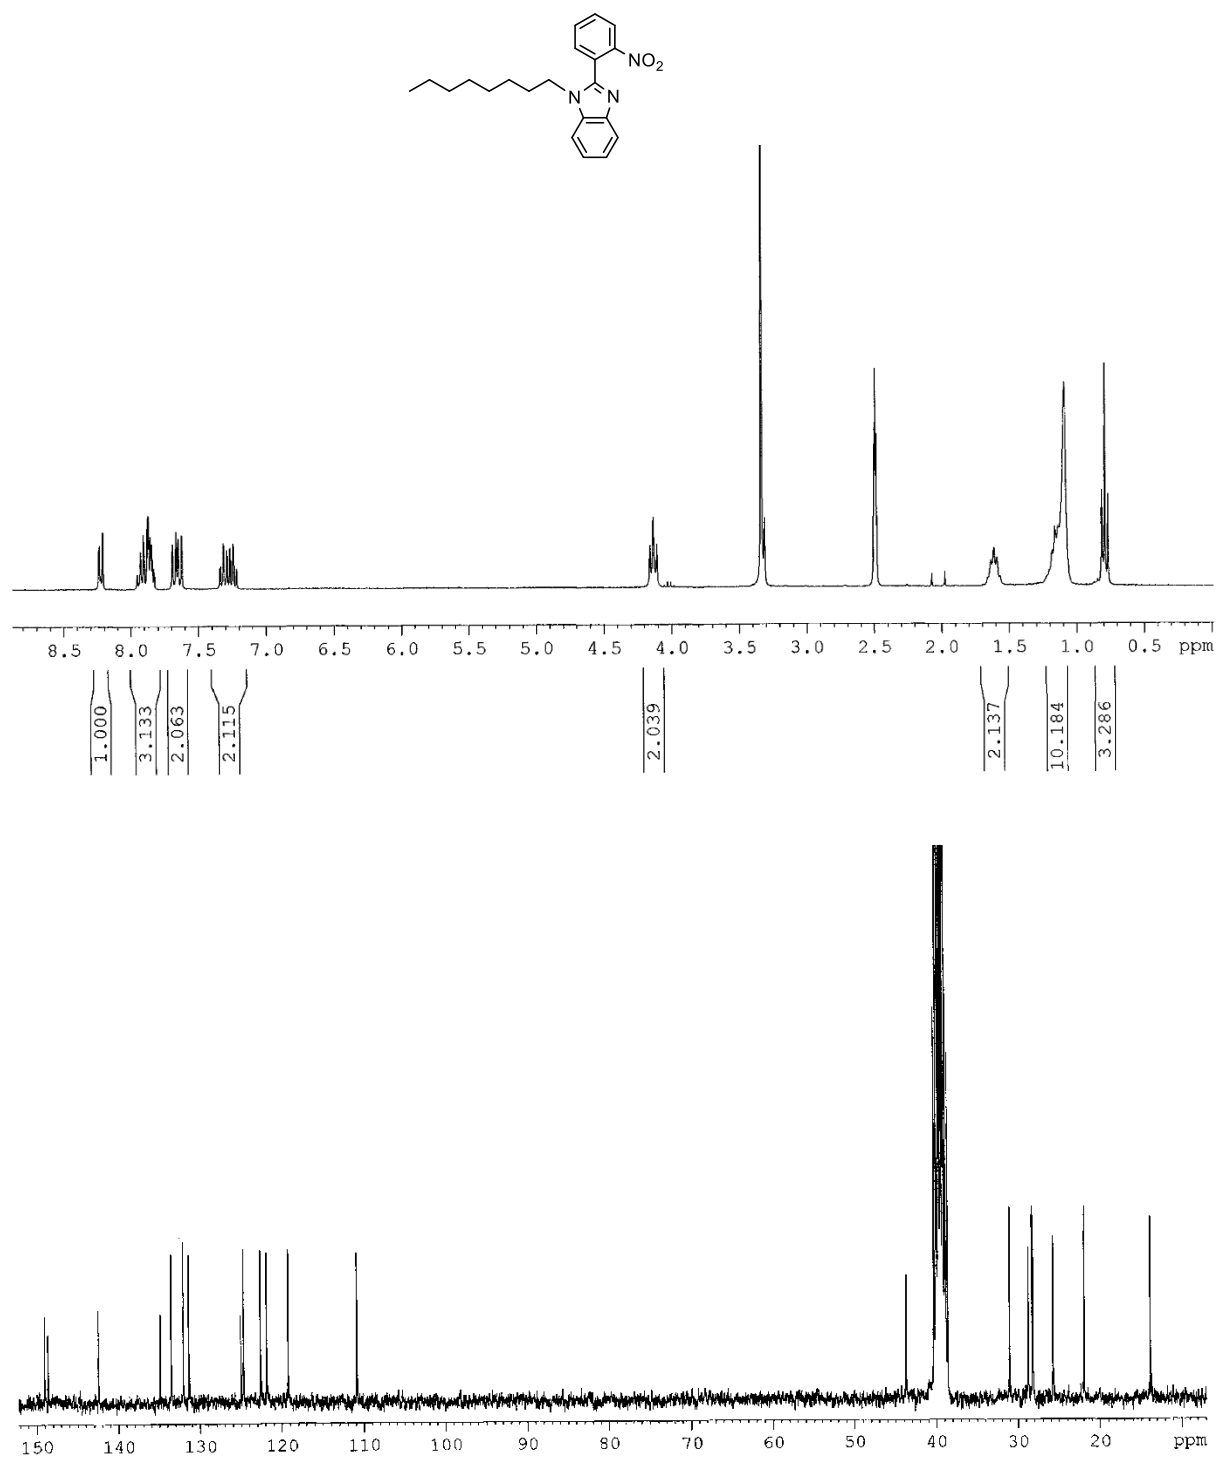

**Figure S5.**  $^1\text{H}$ -NMR and  $^{13}\text{C}$ -NMR spectra of compound **5**.

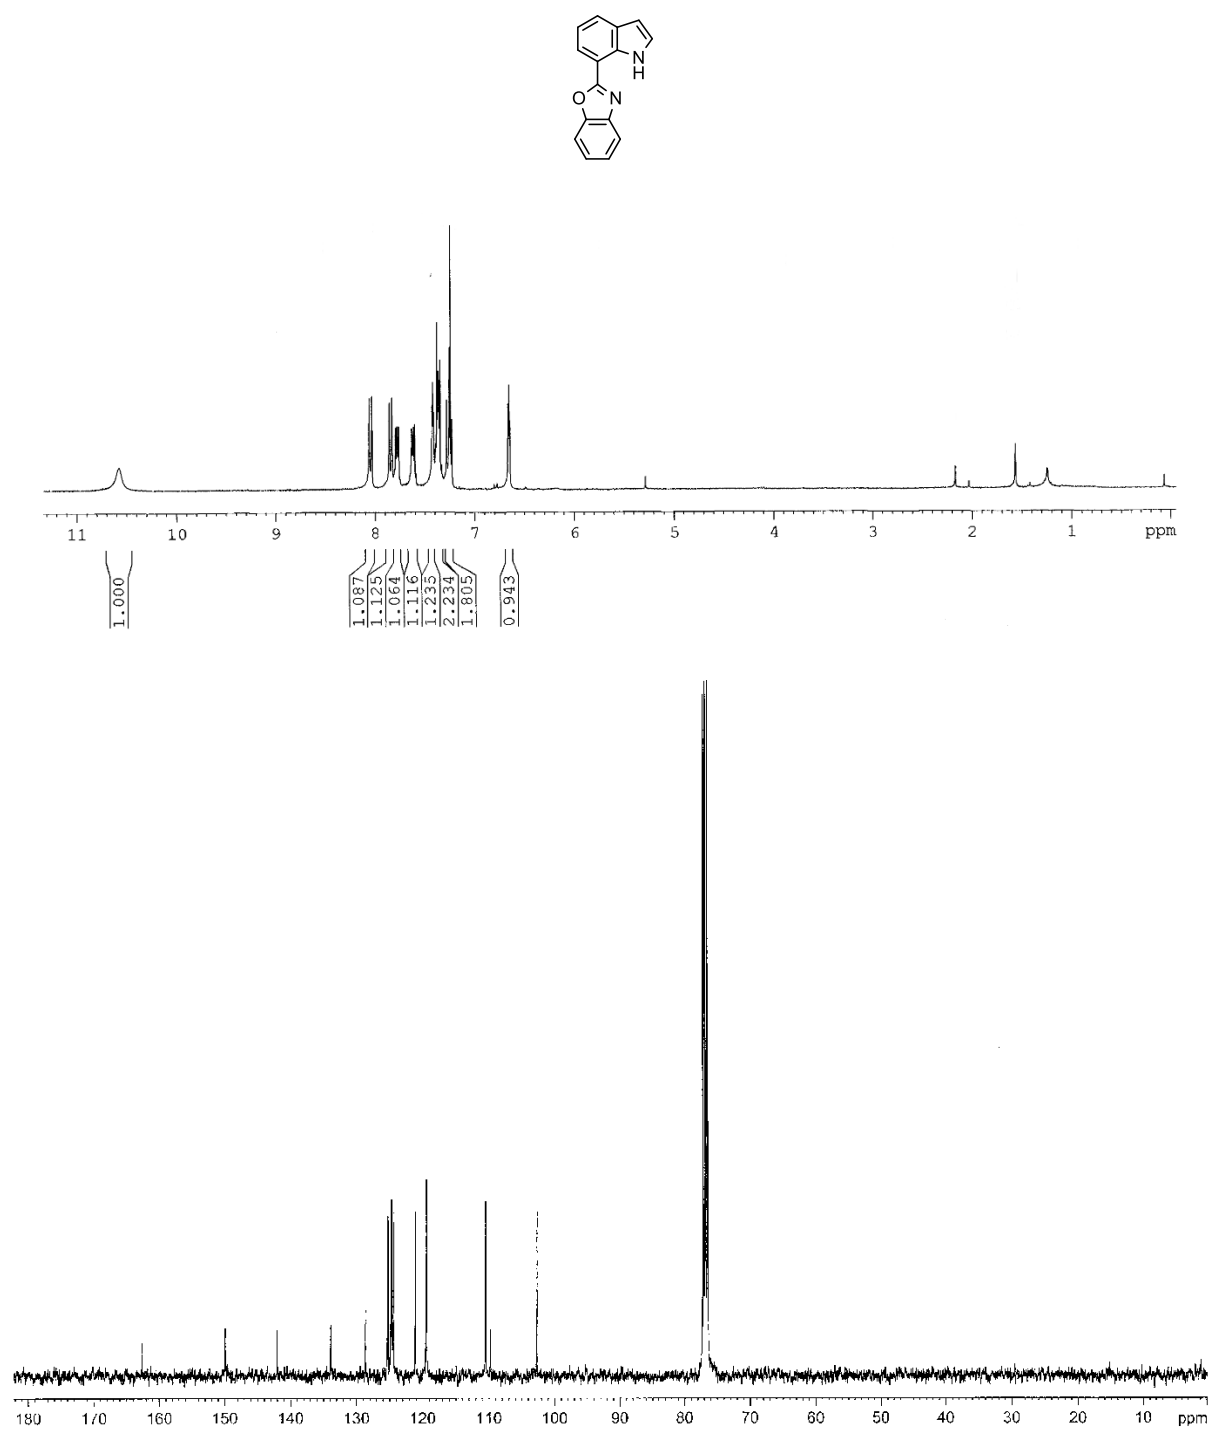

**Figure S6.**  $^1\text{H}$ -NMR and  $^{13}\text{C}$ -NMR spectra of compound **6**

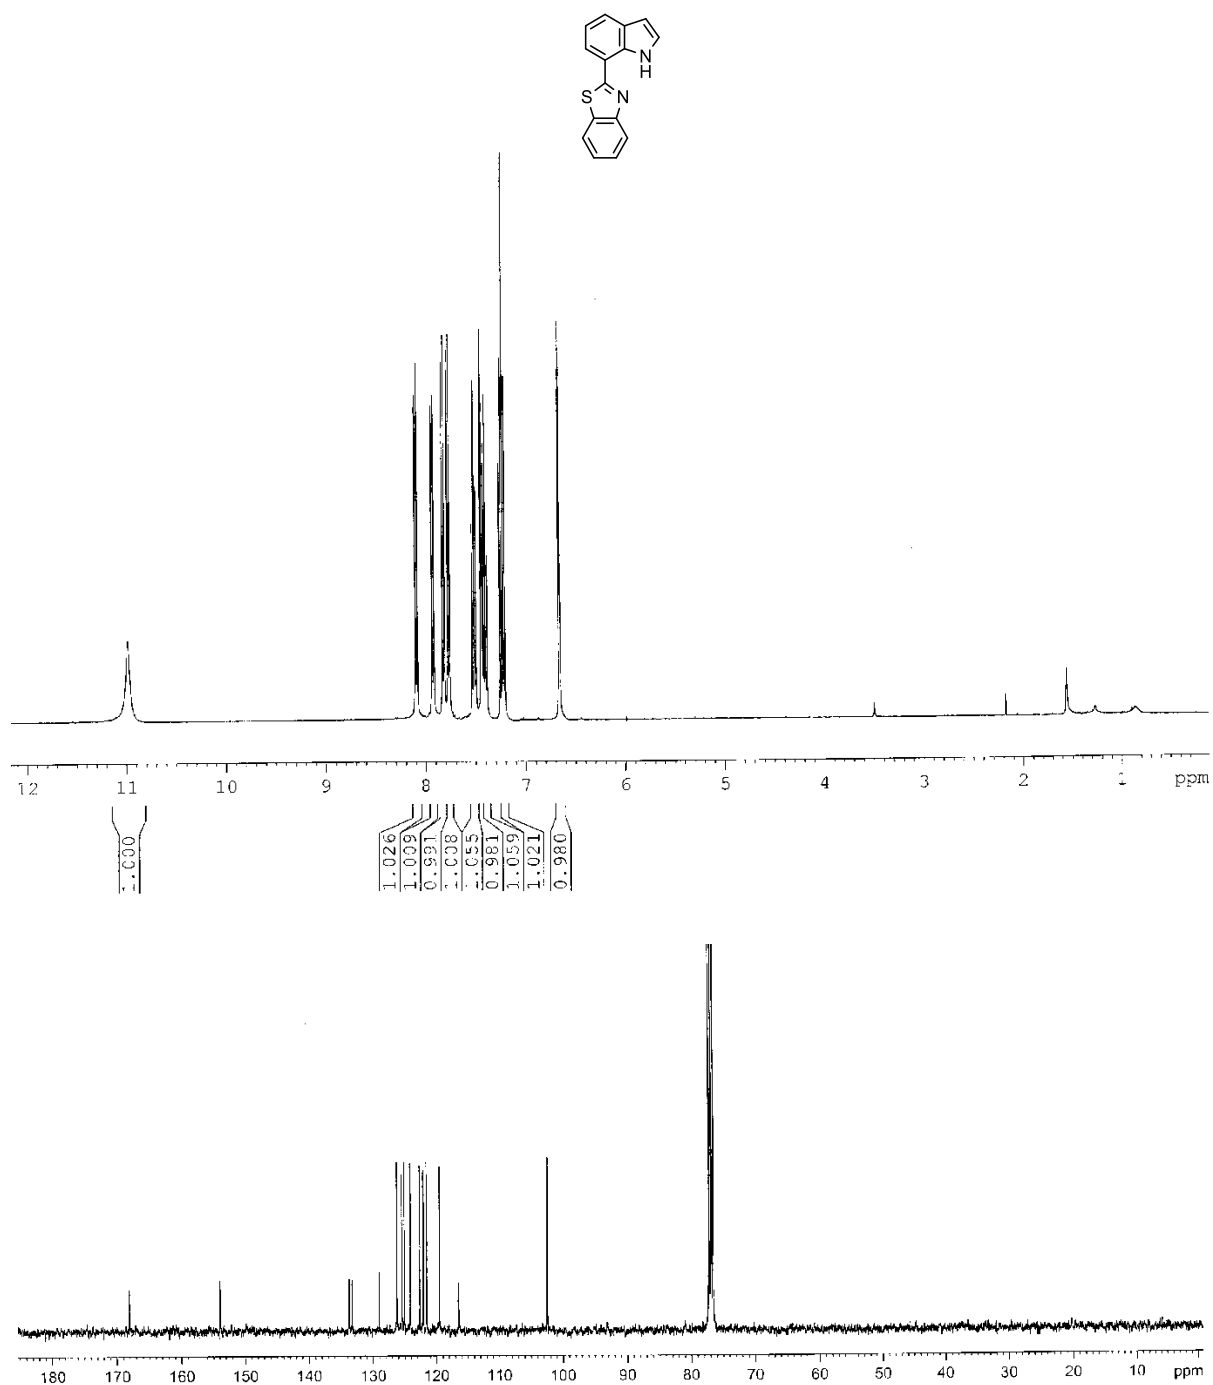

**Figure S7.** <sup>1</sup>H-NMR and <sup>13</sup>C-NMR spectra of compound **7**.

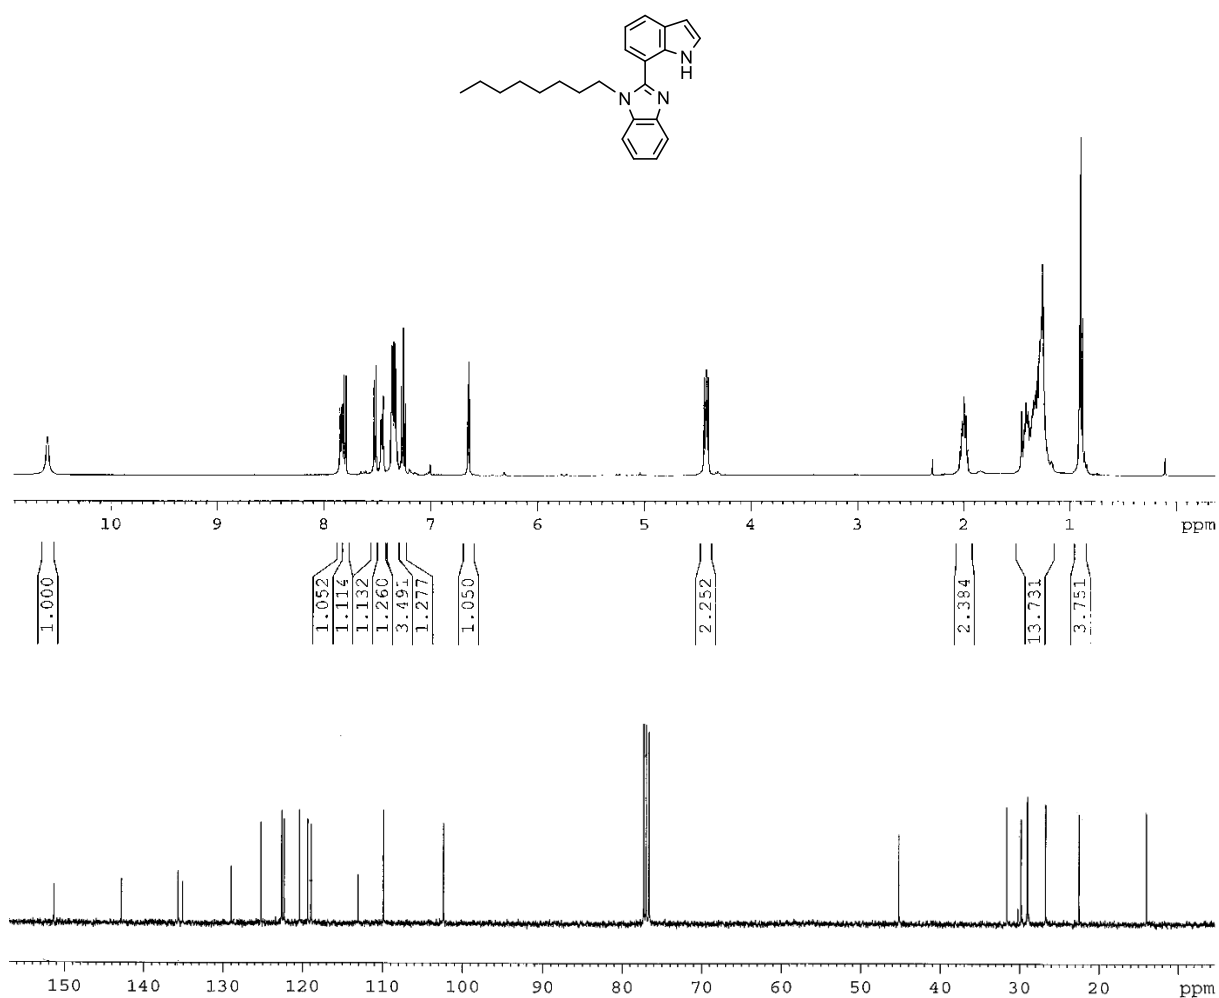

**Figure S8.** <sup>1</sup>H-NMR and <sup>13</sup>C-NMR spectra of compound **8**.

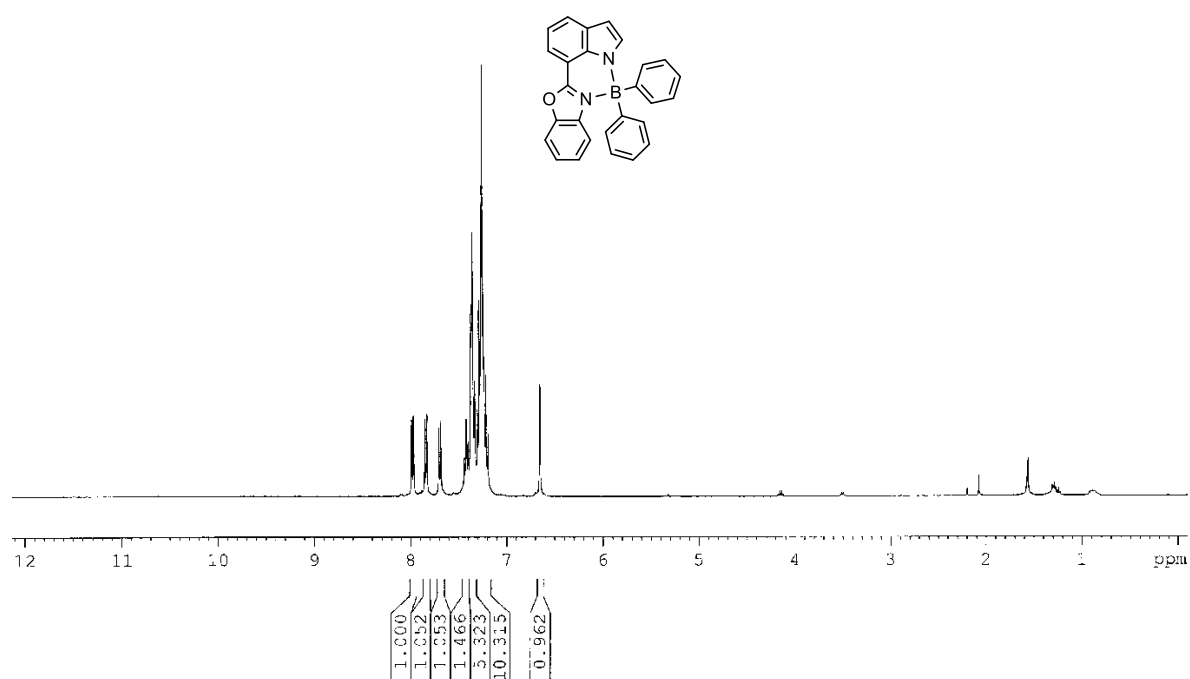



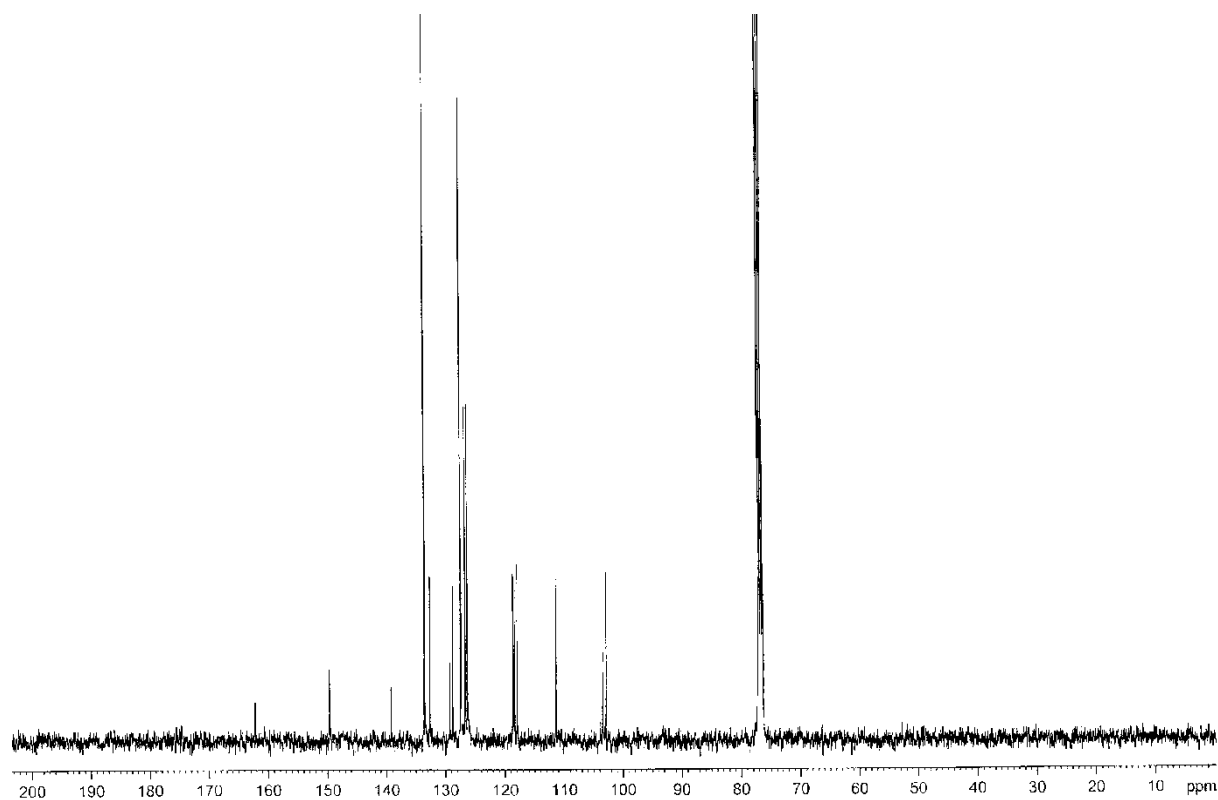

**Figure S9.**  $^1\text{H}$ -NMR and  $^{13}\text{C}$ -NMR spectra of compound **10**.

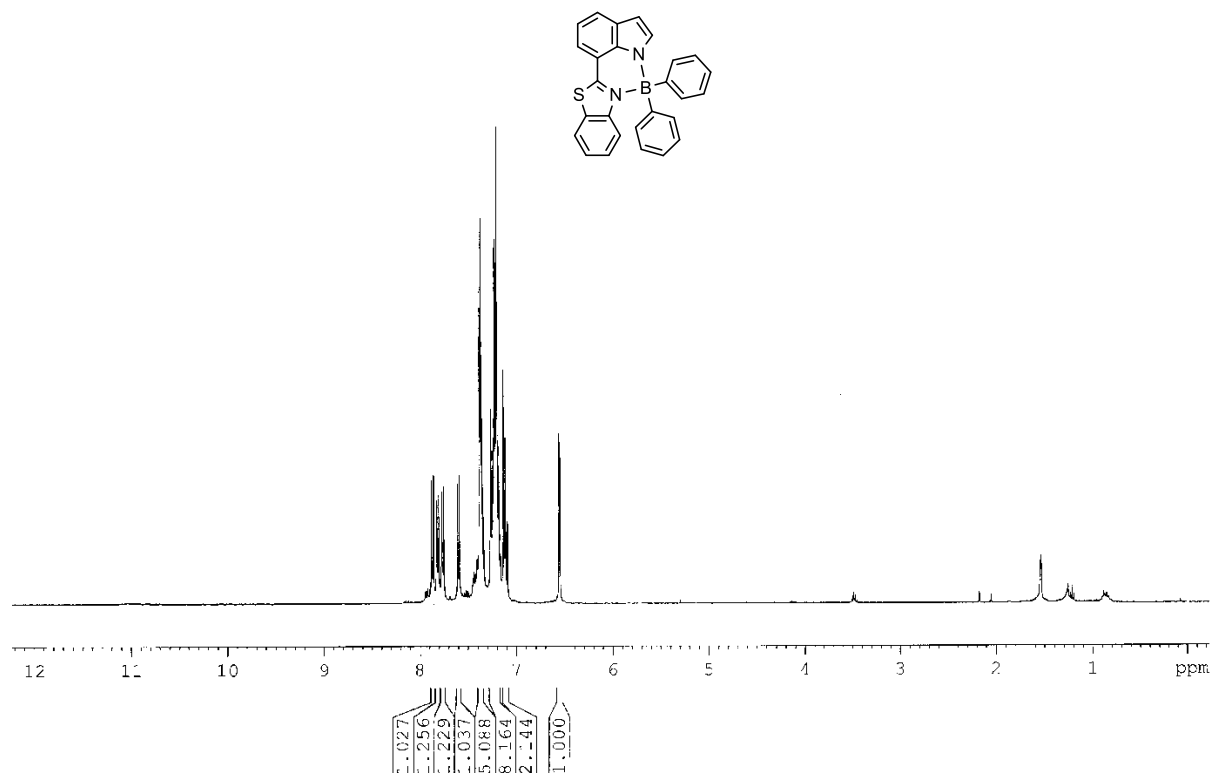

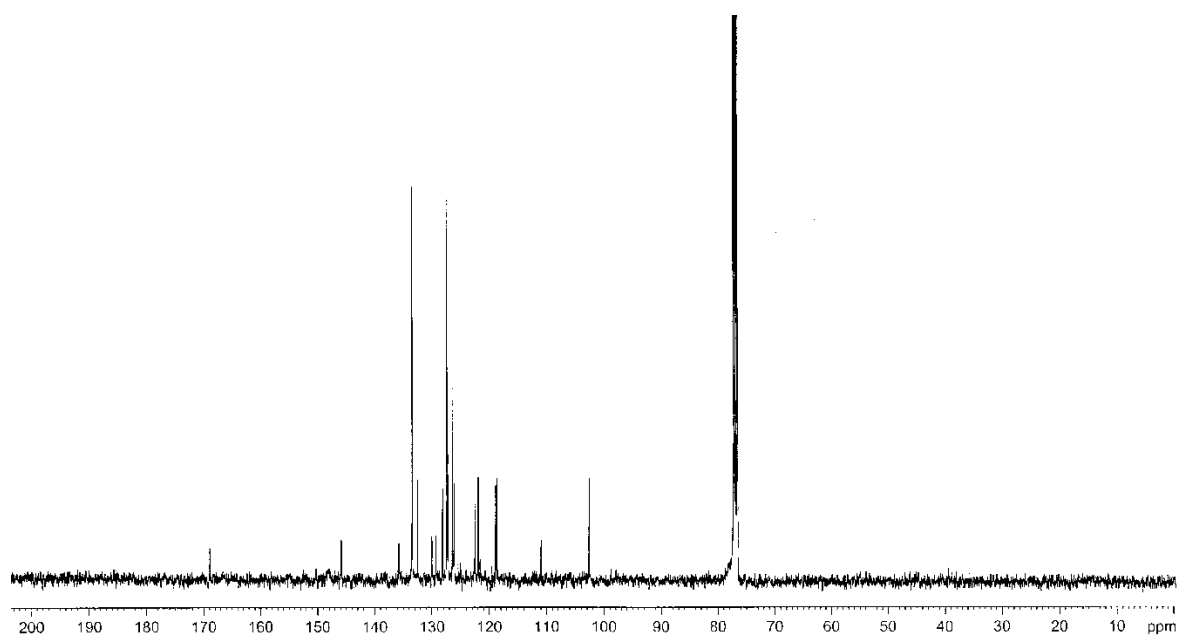

**Figure S10.**  $^1\text{H}$ -NMR and  $^{13}\text{C}$ -NMR spectra of compound **11**.

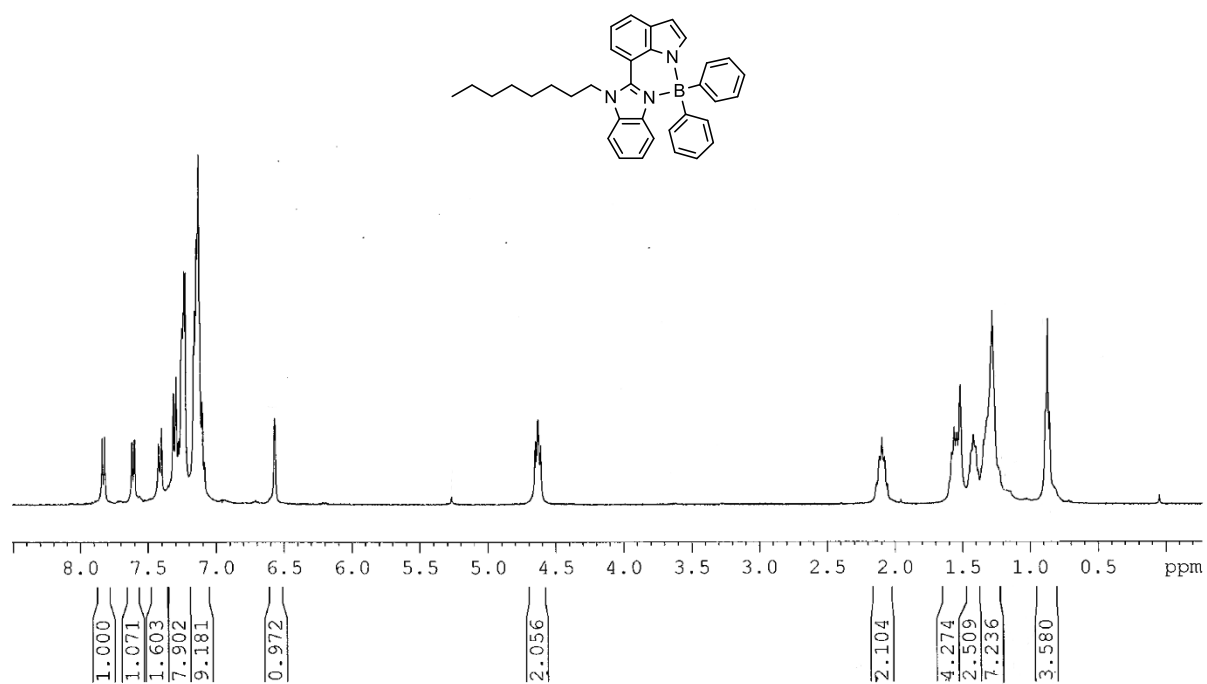

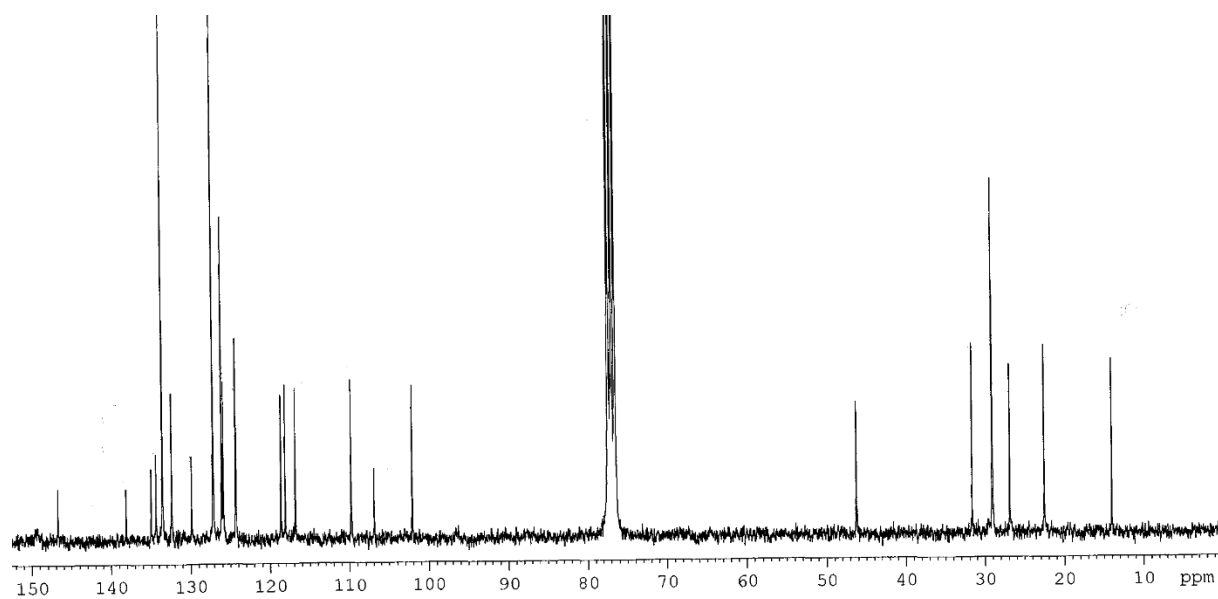

**Figure S11.**  $^1\text{H}$ -NMR and  $^{13}\text{C}$ -NMR spectra of compound **12**.

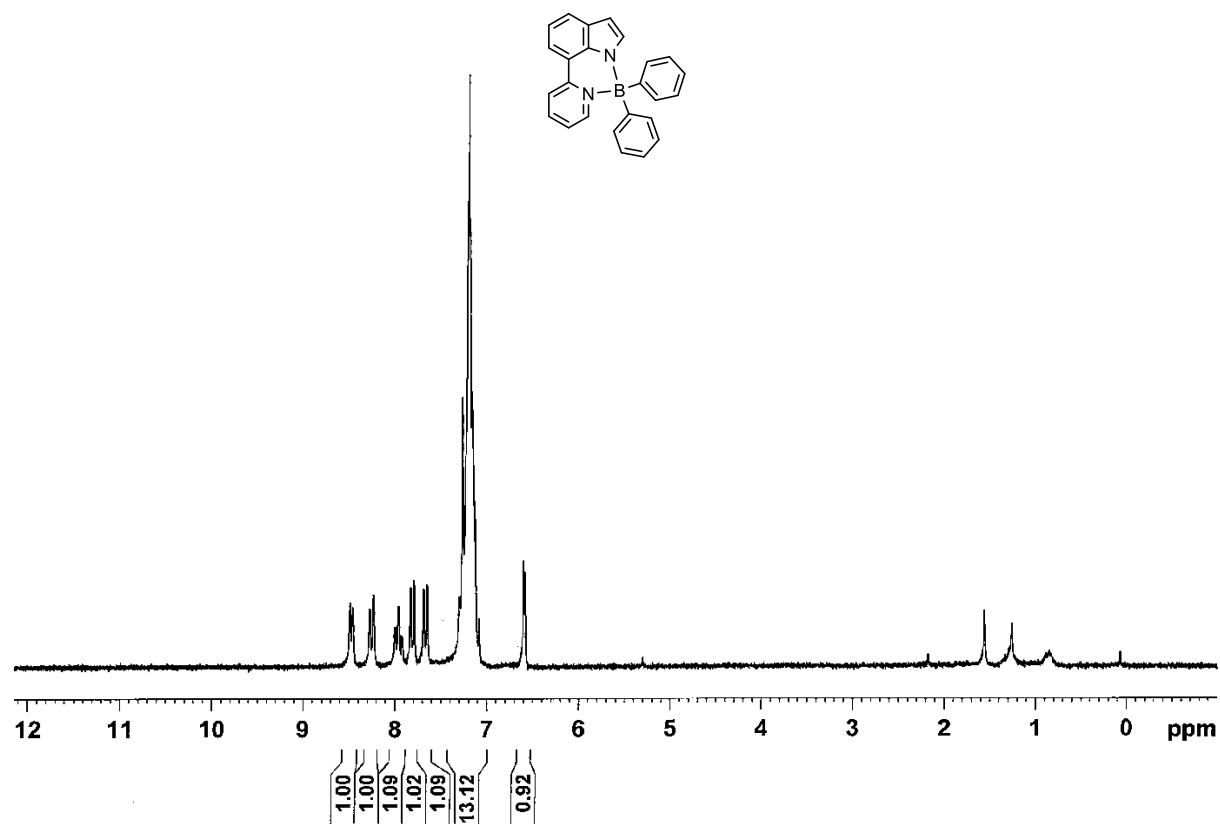

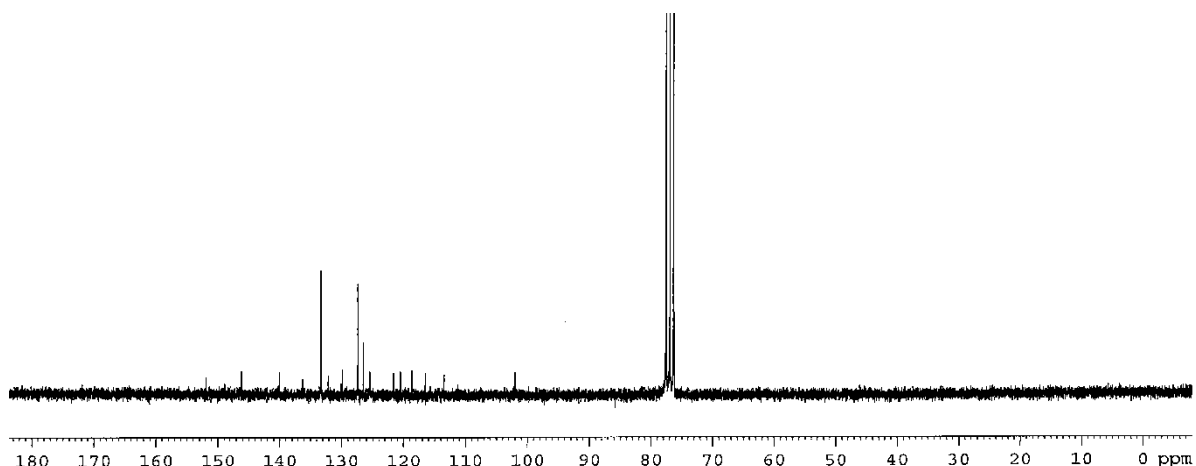

**Figure S12.**  $^1\text{H}$ -NMR and  $^{13}\text{C}$ -NMR spectra of compound **13**.

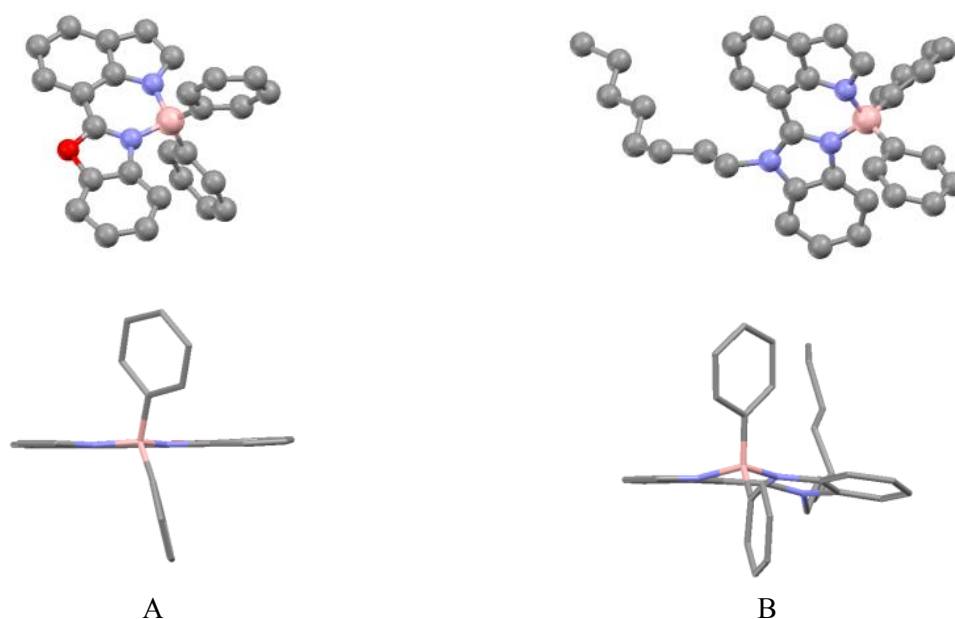

**Figure S13.** Crystal structures of compounds **10** (A) and **12** (B).

The complexation of boron generates a six-membered diazaboracycle where the boron center adopts a distorted tetrahedral geometry verified by the different bond angles measured for the N-B-N, C-B-C or N-B-C sequences. Differences in the bond lengths to the boron atom, were also observed. This was detected even for the C-B bonds between the boron atom and the chemically equivalent phenyl rings. The B-N<sub>indole</sub> distance is very similar for both **10** and **12**. However, as expected from the different heteroaromatic component attached to the indole system, dissimilar bond distances are detected for the B-N<sub>benzoxazole</sub> and B-N<sub>benzimidazole</sub>. It is also worth highlighting the good coplanarity observed for the extended  $\pi$ -conjugate system formed by the indole unit and the azaheteroaromatic component (Figure S13-A).

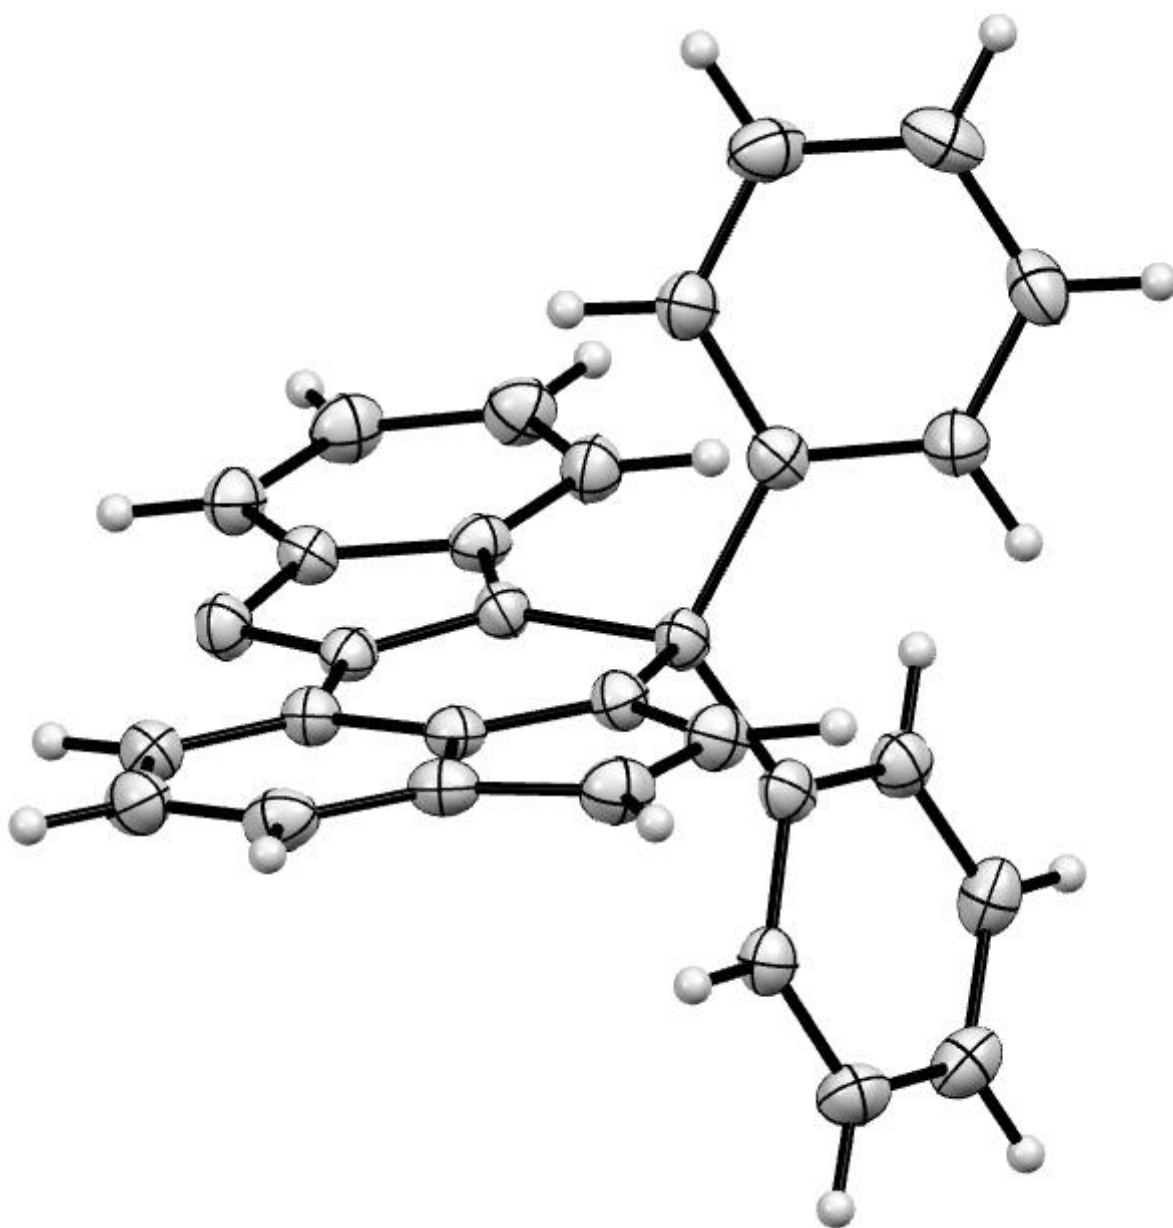

**Figure S14.** X-ray structure of compound **10** (thermal ellipsoid probability level: 50%).

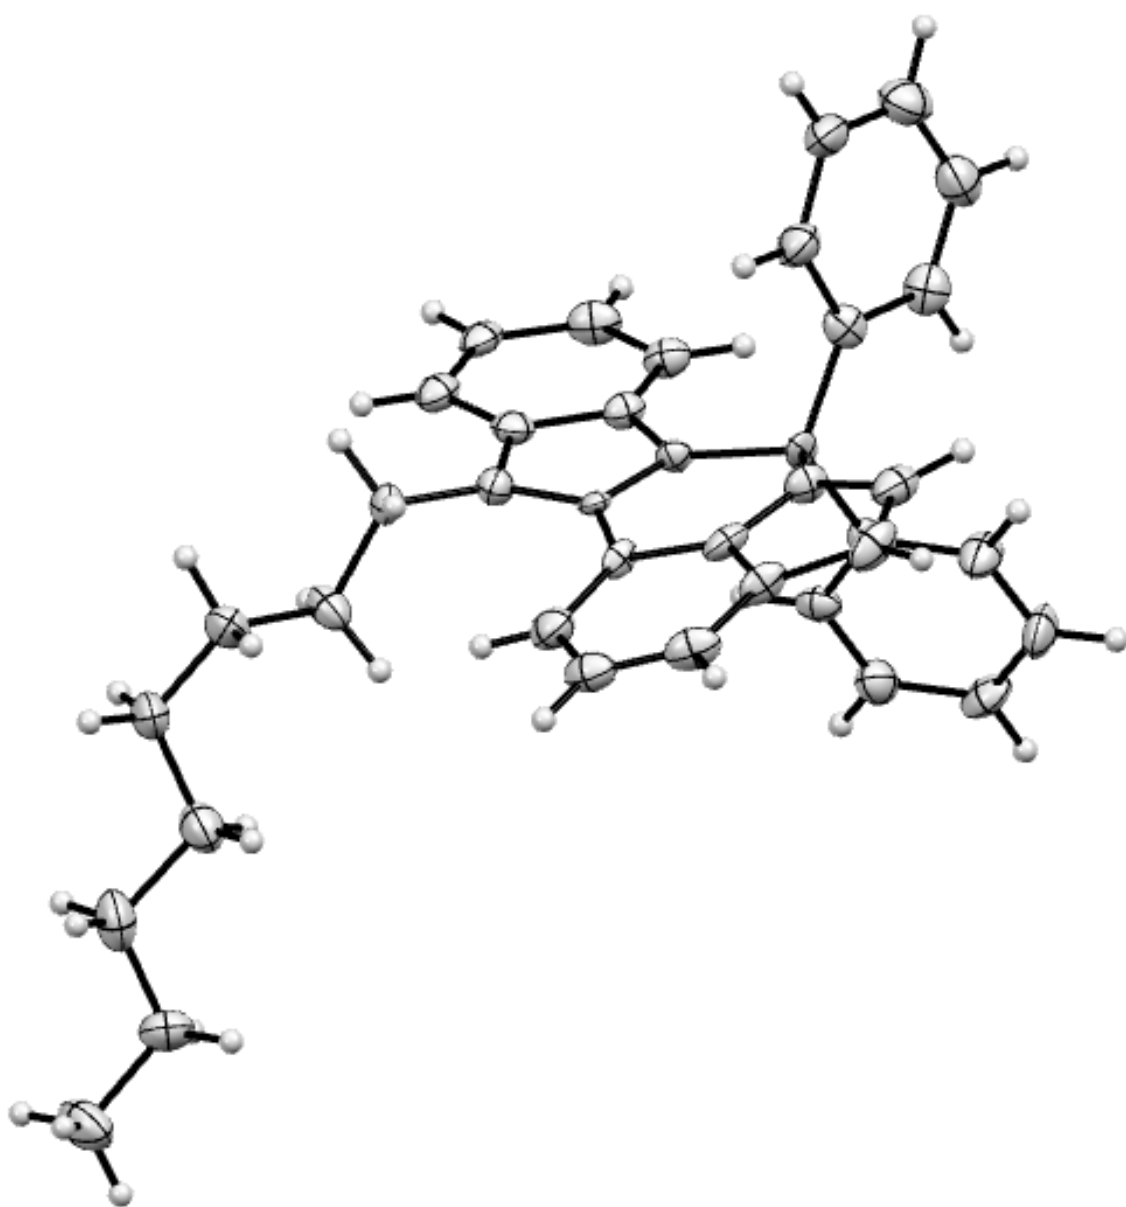

**Figure S15.** X-ray structure of compound **12** (thermal ellipsoid probability level: 50%).

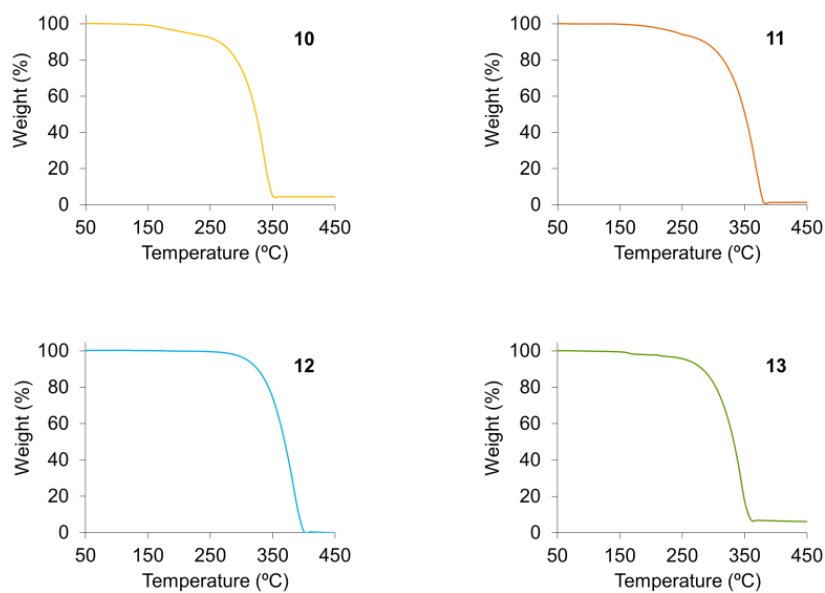

**Figure S16.** Thermogravimetric analysis of the boron complexes **10-13**.

**Table S1.** Decomposition temperature.

|                              | <b>10</b> | <b>11</b> | <b>12</b> | <b>13</b> |
|------------------------------|-----------|-----------|-----------|-----------|
| <b>T (°C) (5% mass loss)</b> | 260       | 310       | 285       | 265       |

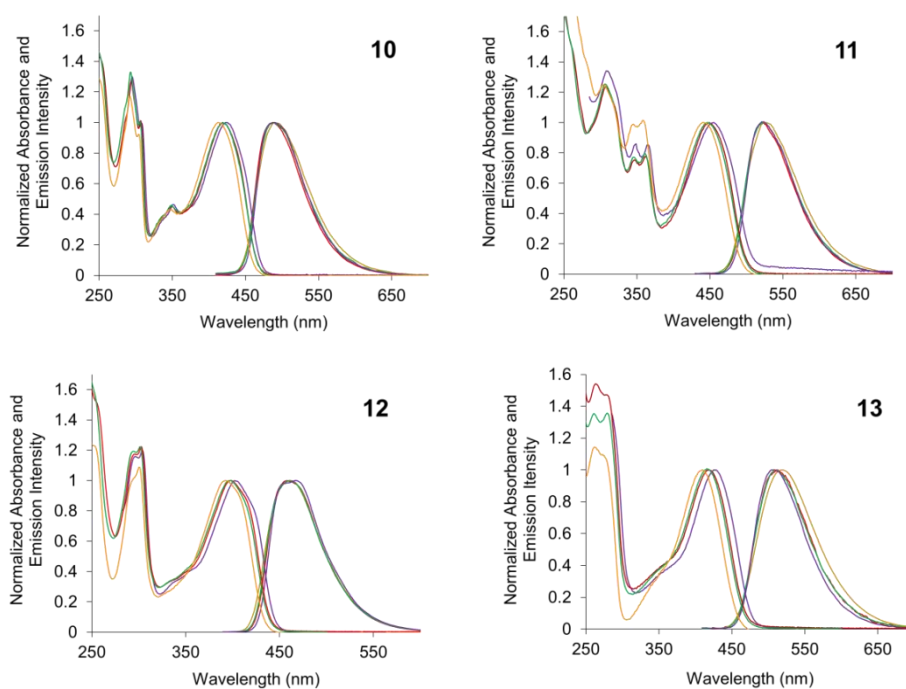

**Figure S17.** Solvent effects on the absorption and emission spectra of the boron complexes **10-13** in toluene (purple), dichloromethane (red), ethanol (green) and acetonitrile (yellow) ( $2 \times 10^{-5}$  M).

Lippert-Mataga model:  $\Delta\tilde{\nu} = \frac{(\mu_e - \mu_g)^2}{2\pi\epsilon_0 h c a^3} \left[ \frac{\epsilon - 1}{2\epsilon + 1} - \frac{n^2 - 1}{2n^2 + 1} \right] + C$ ;  $\Delta f = \left[ \frac{\epsilon - 1}{2\epsilon + 1} - \frac{n^2 - 1}{2n^2 + 1} \right]$

$\Delta\tilde{\nu} = \tilde{\nu}_{abs.} - \tilde{\nu}_{em.}$ : Stokes shift  
 $\mu_e$ : Dipole moment in the excited state.  
 $\mu_g$ : Dipole moment in the ground state.  
 $\epsilon_0$ : Vacuum permittivity.  
 $h$ : Planck.s constant.  
 $c$ : Speed of light.  
 $a$ : Onsager radius  
 $\epsilon$ : Dielectric constant of the solvent.  
 $n$ : Refraction index of the solvent.

**Table S2.** Stokes shifts of the boron complexes **10-13** in different solvents.

|                              | $\tilde{\nu}_a - \tilde{\nu}_e$ (cm <sup>-1</sup> ) [ $\lambda_e - \lambda_a$ ](nm) |                                 |           |                    | $a$ (Å) <sup>a</sup> |
|------------------------------|-------------------------------------------------------------------------------------|---------------------------------|-----------|--------------------|----------------------|
|                              | Toluene                                                                             | CH <sub>2</sub> Cl <sub>2</sub> | EtOH      | CH <sub>3</sub> CN |                      |
| <b>10</b>                    | 3121 [65]                                                                           | 3374 [69]                       | 3374 [69] | 3804 [77]          | 5.40                 |
| <b>11</b>                    | 2894 [69]                                                                           | 3077 [72]                       | 3287 [77] | 3751 [87]          | 5.34                 |
| <b>12</b>                    | 3277 [61]                                                                           | 3291 [60]                       | 3496 [64] | 3753 [68]          | 8.67                 |
| <b>13</b>                    | 3750 [81]                                                                           | 4296 [92]                       | 4353 [92] | 5182 [110]         | 4.50                 |
| <b><math>\Delta f</math></b> | 0.013                                                                               | 0.217                           | 0.289     | 0.305              |                      |

<sup>a</sup> Onsager radius estimated as half of the longest interatomic distance in the molecule, taken from the X-ray structure or the DFT molecular models.

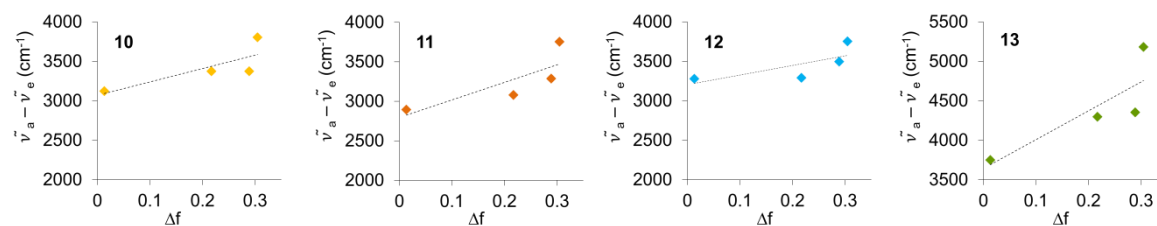

**Figure S18.** Lippert\_Mataga plots of the boron complexes **10-13**.

**Table S3.** Variation between the ground state dipole moment and the excited state dipole moment of the boron complexes **10-13**.

|                     | <b>10</b> | <b>11</b> | <b>12</b> | <b>13</b> |
|---------------------|-----------|-----------|-----------|-----------|
| $\mu_e - \mu_g$ (D) | 0.58      | 0.89      | 0.58      | 0.51      |



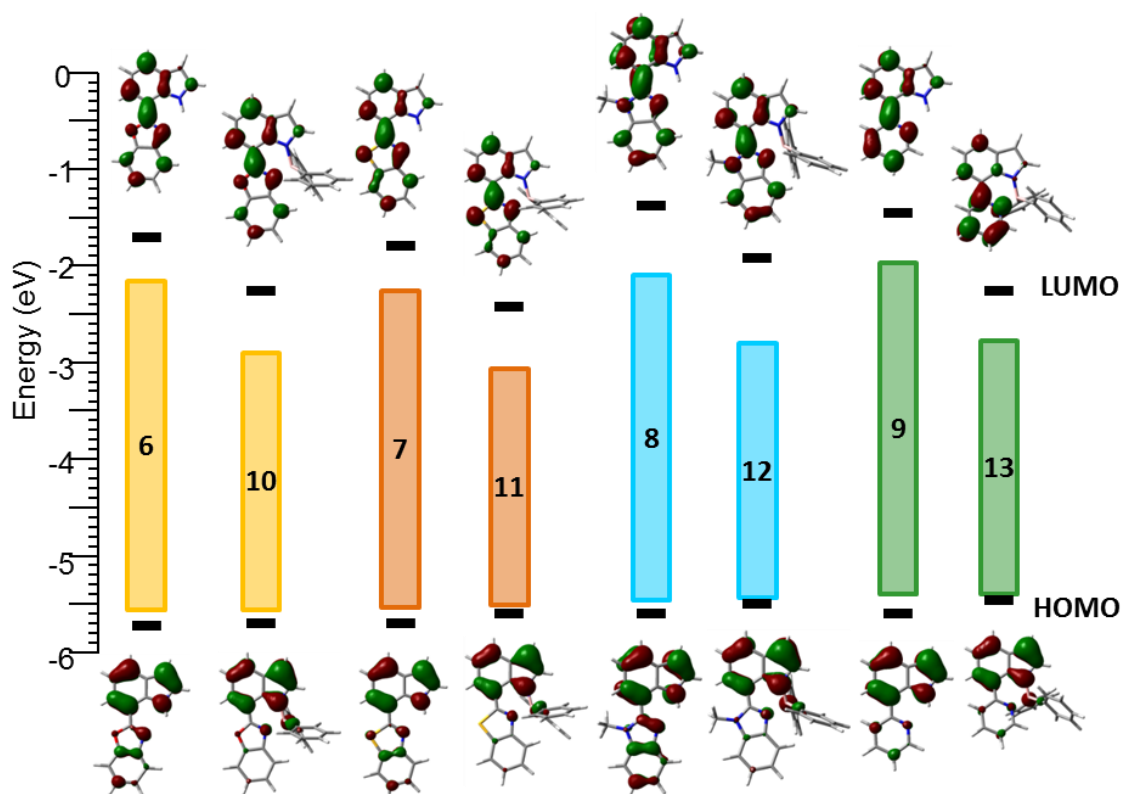

**Figure S19.** HOMO and LUMO energies (experimental: columns; theoretical: black dashes) and isosurfaces for the ligands **6-9** and boron complexes **10-13**.

**Table S4.** TD-DFT calculation of the absorption spectrum of compound **10**.

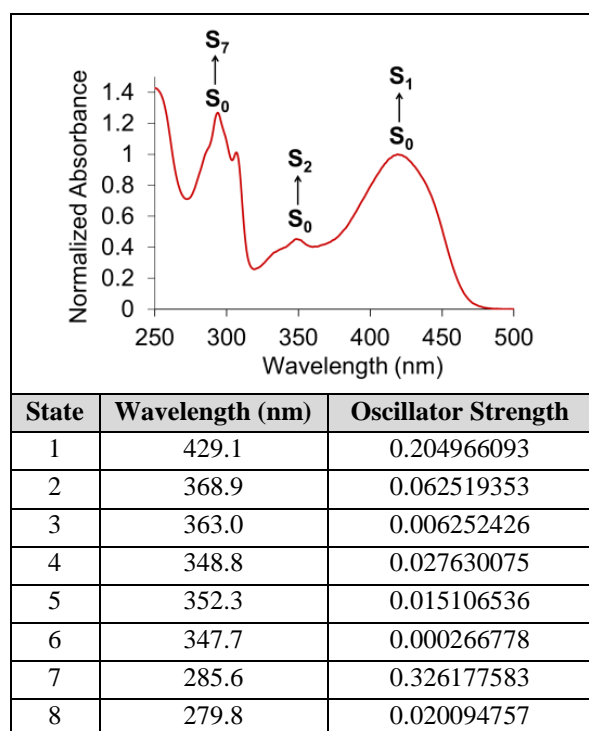

| State 1         | Configuration Interaction |
|-----------------|---------------------------|
| HOMO-6 → LUMO   | 0.021831                  |
| HOMO → LUMO     | 0.928658                  |
| State 2         |                           |
| HOMO-1 → LUMO   | 0.940181                  |
| HOMO → LUMO+7   | 0.023649                  |
| State 7         |                           |
| HOMO-7 → LUMO   | 0.047271                  |
| HOMO-7 → LUMO+2 | 0.014015                  |
| HOMO-6 → LUMO   | 0.773869                  |
| HOMO-3 → LUMO   | 0.017704                  |
| HOMO → LUMO     | 0.019562                  |
| HOMO → LUMO+1   | 0.036516                  |
| HOMO → LUMO+2   | 0.010667                  |
| HOMO → LUMO+4   | 0.013975                  |
| HOMO → LUMO+7   | 0.015668                  |

|               |                                                                                      |
|---------------|--------------------------------------------------------------------------------------|
|               | <b>10</b>                                                                            |
| <b>LUMO+1</b> | 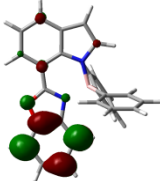   |
| <b>LUMO</b>   |    |
| <b>HOMO</b>   |    |
| <b>HOMO-1</b> |   |
| <b>HOMO-2</b> |  |
| <b>HOMO-3</b> |  |
| <b>HOMO-4</b> |  |
| <b>HOMO-5</b> |  |
| <b>HOMO-6</b> |  |

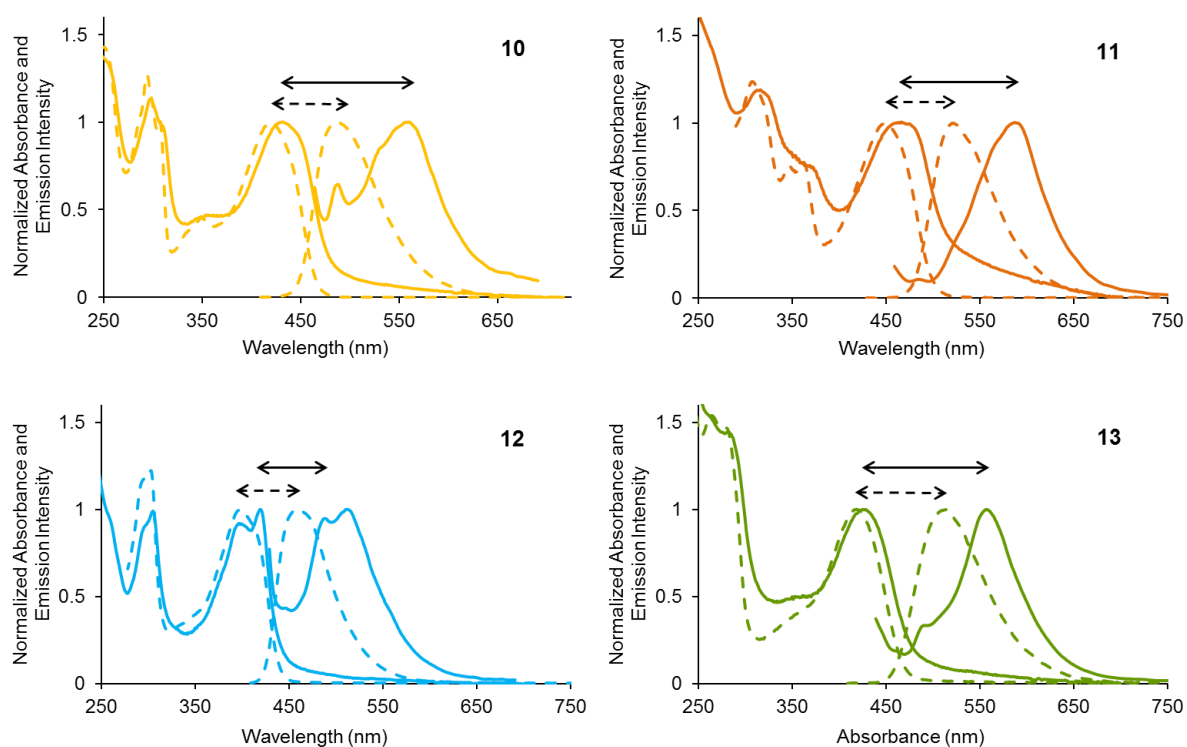

**Figure S20.** Absorption and emission spectra in solution ( $\text{CH}_2\text{Cl}_2$ ,  $2 \times 10^{-5} \text{M}$ , dashed plot) and in solid thin film (continuous plot) of the boron complexes.

**Table S5.** Stokes shift in solid thin films.

|                                                   | <b>10</b> | <b>11</b> | <b>12</b> | <b>13</b> |
|---------------------------------------------------|-----------|-----------|-----------|-----------|
| $\lambda_{\text{em}} - \lambda_{\text{abs}}$ (nm) | 125       | 122       | 92        | 129       |

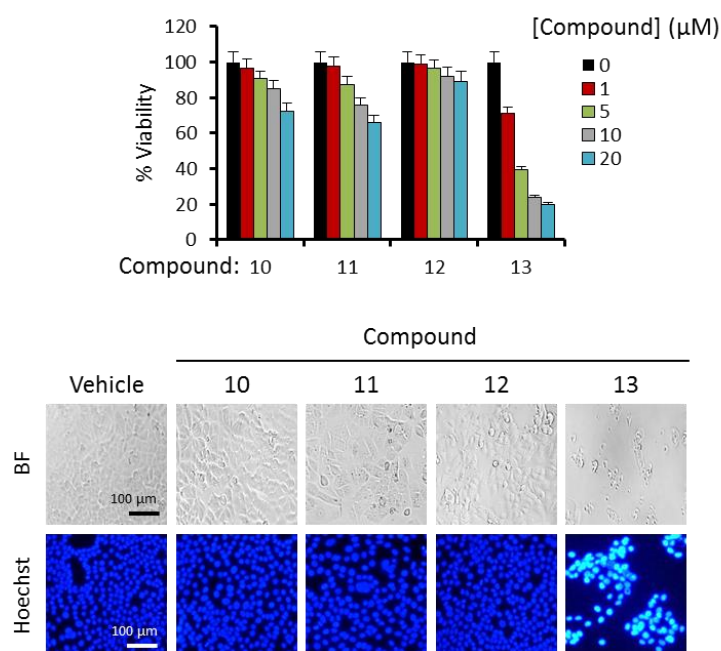

**Figure S21.** Effect of organoboron compounds **10-13** on the human breast cancer cell line MCF7. (a) Concentration-dependent effect on the viability of MCF7 treated during 48 h with indicated compounds. (b) Morphology of untreated MCF7 cells (vehicle) compared with those subjected to 48 h of treatment with 10  $\mu$ M of indicated compounds. Morphology was determined by bright field (BF) microscopy. The Hoechst assay was used to assess apoptosis induction in untreated MCF7 cells (vehicle) and those cells subjected to 48 h of treatment with 10  $\mu$ M of indicated compounds. Strong fluorescence was observed in the nuclei of apoptotic cells treated with compound **13**, while weak fluorescence was observed in other treatments corresponding to non-apoptotic cells.

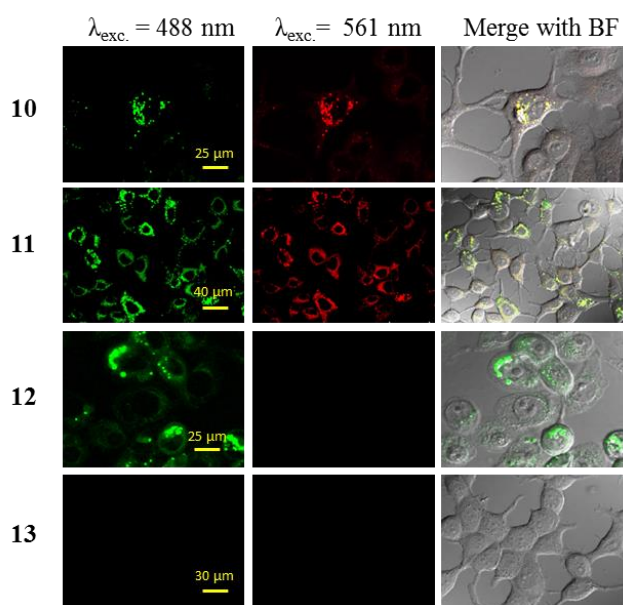

**Figure S22.** Confocal microscopy of compounds **10-13**.
